# Supplementary material for: Optimization of fluxes for Yb3+:YMgB5O10 crystal growth and intense multi-wavelength emission characteristics in spectra and laser performances
Source: Royal Society of Chemistry journal article supplement (doi:10.1039/d1tc03909a), 2021-01-01
Supplement: d1tc03909a1.pdf [file d1tc03909a1.pdf]

## Supplementary Information

### Optimization of fluxes for Yb<sup>3+</sup>:YMgB<sub>5</sub>O<sub>10</sub> crystal growth and intense multi-wavelength emission characteristics in spectra and laser performances

Shijia Sun,<sup>\*a</sup> Bingxuan Li,<sup>b</sup> Fei Lou,<sup>c</sup> Xingjun Shi,<sup>a</sup> Weidong Chen,<sup>b</sup> Feifei Yuan,<sup>b</sup> Lizhen Zhang,<sup>b</sup> Zhoubin Lin,<sup>b</sup> Degao Zhong,<sup>a</sup> Yisheng Huang<sup>\*b</sup> and Bing Teng<sup>\*a</sup>

<sup>a</sup> College of Physics, University-Industry Joint Center for Ocean Observation and Broadband Communication, National Demonstration Center for Experimental Applied Physics Education, Qingdao University, Qingdao 266071, China. E-mail: [ssj1027@126.com](mailto:ssj1027@126.com) (S. Sun), [5108tb@163.com](mailto:5108tb@163.com) (B. Teng)

<sup>b</sup> Key Laboratory of Optoelectronic Materials Chemistry and Physics, Fujian Institute of Research on the Structure of Matter, Chinese Academy of Sciences, Fuzhou 350002, China. E-mail: [hysh@fjirsm.ac.cn](mailto:hysh@fjirsm.ac.cn) (Y. Huang)

<sup>c</sup> School of Mathematics and Physics, Qingdao University of Science and Technology, Qingdao 266061, China

**Figure S1.** Schematic diagram of crystal growth apparatus.

**Figure S2.** Thermal expansion coefficients of Yb:YMB crystal.

**Figure S3.** Differential thermal analysis (DTA) and thermogravimetry (TG) of Yb:YMB crystal.

**Figure S4.** Powder XRD patterns of Yb:YMB crystal.

**Figure S5.** Cyan light emission phenomenon in the laser experiment.

**Figure S6.** Laser spectra corresponding to the cyan light emission.

**Table S1** Atomic coordinates and equivalent isotropic displacement parameters of Yb:YMB crystal.

**Table S2** Selected bond distances (Å) of Yb:YMB crystal.

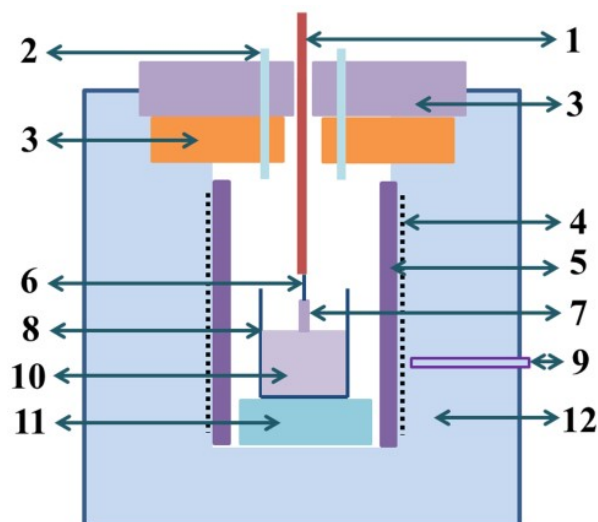

**Fig. S1.** Schematic diagram of crystal growth apparatus. (1) seed-holder, (2) watch window, (3) furnace cover (thermal insulation materials), (4) nickel-chrome heating wires, (5) Al<sub>2</sub>O<sub>3</sub> tube, (6) platinum wires, (7) seed, (8) platinum crucible, (9) thermocouple, (10) solution, (11) thermal insulation materials (the height is based on the thermal field ), (12) thermal insulation materials.

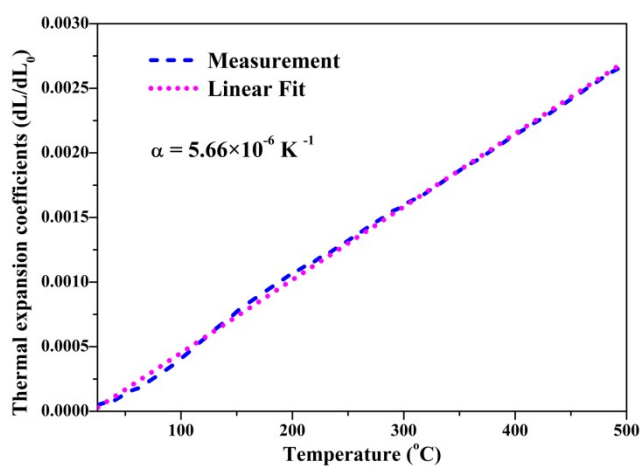

**Fig. S2.** Thermal expansion coefficients of Yb:YMB crystal.

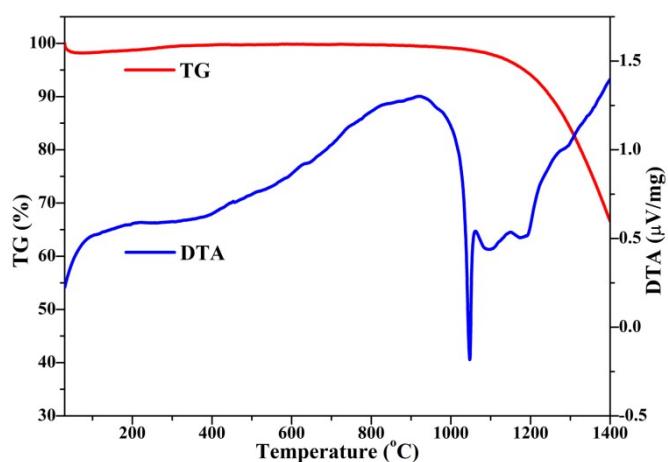

**Fig. S3.** Differential thermal analysis (DTA) and thermogravimetry (TG) of Yb:YMB crystal.

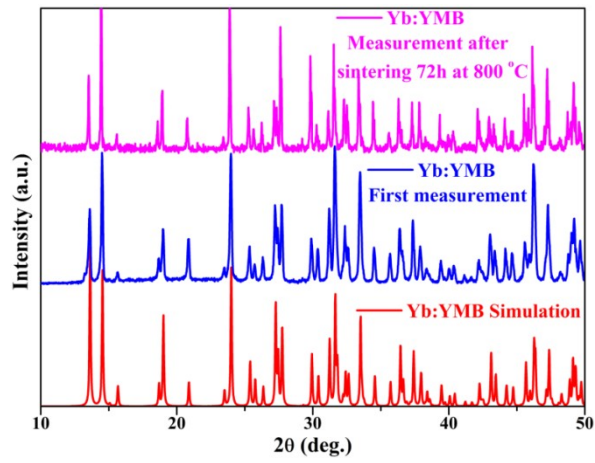

**Fig. S4.** Powder XRD patterns of Yb:YMB crystal.

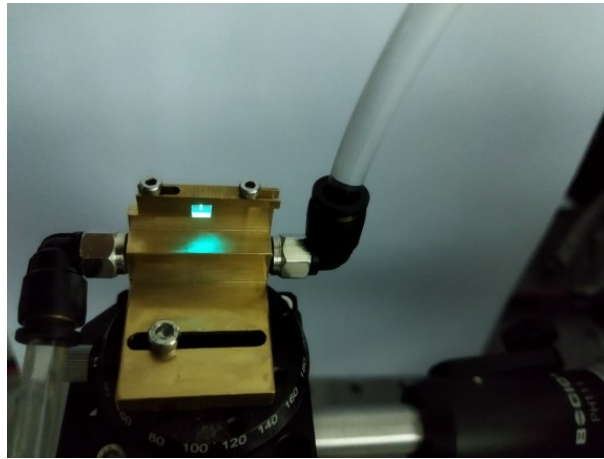

**Fig. S5.** Cyan light emission phenomenon in the laser experiment.

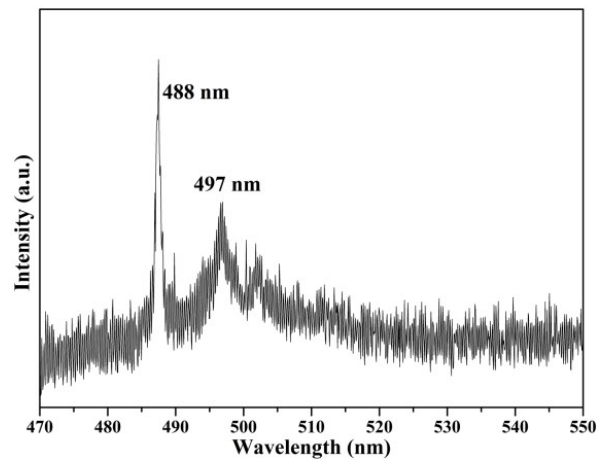

**Fig. S6.** Laser spectra corresponding to the cyan light emission.

**Table S1** Atomic coordinates and equivalent isotropic displacement parameters of Yb:YMB crystal

| Atom  | x/a      | y/b      | z/c     | $U(\text{eq})[\text{\AA}^2]^*$ |
|-------|----------|----------|---------|--------------------------------|
| Y(1)  | 1855(1)  | 1866(1)  | 7395(1) | 4(1)                           |
| Yb(1) | 1855(1)  | 1866(1)  | 7395(1) | 4(1)                           |
| Mg(1) | 6002(1)  | 4080(2)  | 6280(1) | 6(1)                           |
| B(1)  | -653(4)  | 3113(5)  | 9105(4) | 5(1)                           |
| B(2)  | 5842(4)  | 751(5)   | 7430(4) | 5(1)                           |
| B(3)  | -2234(4) | 326(5)   | 5548(4) | 5(1)                           |
| B(4)  | 3398(4)  | -1003(5) | 9939(4) | 6(1)                           |
| B(5)  | -177(4)  | 1740(5)  | 3955(4) | 3(1)                           |
| O(1)  | 1767(2)  | -1075(3) | 5822(2) | 5(1)                           |
| O(2)  | 456(2)   | 2710(3)  | 5210(2) | 5(1)                           |
| O(3)  | -94(2)   | 4091(3)  | 8024(2) | 6(1)                           |
| O(4)  | 58(2)    | 1504(3)  | 9262(2) | 5(1)                           |
| O(5)  | 6860(2)  | 327(3)   | 8741(2) | 5(1)                           |
| O(6)  | 2569(2)  | -517(3)  | 8735(2) | 6(1)                           |
| O(7)  | 6816(2)  | 1509(3)  | 6353(2) | 5(1)                           |
| O(8)  | -841(2)  | -281(3)  | 6484(2) | 5(1)                           |
| O(9)  | 3184(2)  | 1263(3)  | 4910(2) | 5(1)                           |
| O(10) | 4636(2)  | 2082(3)  | 7700(2) | 4(1)                           |

\*  $U(\text{eq})$  is defined as one-third of the trace of the orthogonalized  $U_{ij}$  tensor.

**Table S2** Selected bond distances (Å) of Yb:YMB crystal

|                   |          |              |          |
|-------------------|----------|--------------|----------|
| Y(1)/Yb(1)-O(6)   | 2.255(2) | B(1)-O(9)#4  | 1.365(4) |
| Y(1)/Yb(1)-O(6)#1 | 2.311(2) | B(2)-O(3)#5  | 1.458(4) |
| Y(1)/Yb(1)-O(10)  | 2.373(2) | B(2)-O(7)    | 1.462(4) |
| Y(1)/Yb(1)-O(2)   | 2.384(2) | B(2)-O(10)   | 1.471(4) |
| Y(1)/Yb(1)-O(4)   | 2.409(2) | B(2)-O(5)    | 1.490(4) |
| Y(1)/Yb(1)-O(3)   | 2.461(2) | B(3)-O(7)#6  | 1.449(4) |
| Y(1)/Yb(1)-O(1)#1 | 2.516(2) | B(3)-O(1)#7  | 1.478(4) |
| Y(1)/Yb(1)-O(1)   | 2.664(2) | B(3)-O(9)#7  | 1.496(4) |
| Y(1)/Yb(1)-O(9)   | 2.687(2) | B(3)-O(8)    | 1.500(4) |
| Mg(1)-O(4)#2      | 2.050(2) | B(4)-O(6)    | 1.341(4) |
| Mg(1)-O(5)#3      | 2.051(2) | B(4)-O(5)#8  | 1.366(4) |
| Mg(1)-O(7)        | 2.063(3) | B(4)-O(2)#5  | 1.391(4) |
| Mg(1)-O(4)#1      | 2.091(2) | B(5)-O(2)    | 1.457(4) |
| Mg(1)-O(8)#1      | 2.158(2) | B(5)-O(1)#7  | 1.471(4) |
| Mg(1)-O(10)       | 2.365(2) | B(5)-O(10)#9 | 1.473(4) |
| B(1)-O(3)         | 1.362(4) | B(5)-O(8)#7  | 1.478(4) |
| B(1)-O(4)         | 1.363(4) |              |          |

Symmetry codes: (#1)  $-x+1/2, y+1/2, -z+3/2$ ; (#2)  $x+1/2, -y+1/2, -z-1/2$ ; (#3)  $-x+3/2, y+1/2, -z+3/2$ ; (#4)  $x-1/2, -y+1/2, z+1/2$ ; (#5)  $-x+1/2, y-1/2, -z+3/2$ ; (#6)  $x-1, y, z$ ; (#7)  $-x, -y, -z+1$ ; (#8)  $-x+1, -y, -z+2$ ; (#9)  $x-1/2, -y+1/2, z-1/2$
